# Supplementary material for: Integrin Beta 5 Is a Prognostic Biomarker and Potential Therapeutic Target in Glioblastoma
Source: Front Oncol. 2019 Sep 20;9:904. doi: 10.3389/fonc.2019.00904 (PMC6764112; doi:10.3389/fonc.2019.00904)
Supplement: Table S2 — ITGB5 copy number variation frequency in TCGA. [file Table_2.XLSX]

## Sheet: Sheet1
TCGA RNAseq dataset, GBM
sample	Grade II	Grade III	Grade IV
amplification	2/224	7/243	27/150
deletion	13/224	19/243	10/150
TCGA RNAseq dataset, GBM
sample	ITGB5 Low expression	ITGB5 High expression
amplification	12/74	15/76
deletion	9/74	1/76
TCGA 4502A mRNA microarray dataset， GBM
sample	OSMR Low expression	OSMR High expression
amplification	26/237	33/231
deletion	36/237	11/231

## Sheet: Sheet2
samples	Grade	ITGB5	ITGB5-CAN
TCGA.HT.7467	II	9.75974	0
TCGA.HT.7691	II	11.6719	0
TCGA.HT.7877	II	9.43765	0
TCGA.HT.8015	II	10.595	0
TCGA.HT.A5R5	II	11.8248	0
TCGA.HT.A5RB	II	9.93929	0
TCGA.F6.A8O3	II	8.95394	0
TCGA.F6.A8O4	II	10.817	0
TCGA.HT.7676	II	11.0913	0
TCGA.P5.A5EV	II	11.247	0
TCGA.HT.7875	II	10.6232	0
TCGA.HT.8107	II	9.46605	0
TCGA.HT.7680	II	12.0476	0
TCGA.DU.6400	II	8.82987	1
TCGA.P5.A5F6	II	10.4595	-1
TCGA.HT.8010	II	10.9641	0
TCGA.HT.A616	II	10.26	0
TCGA.QH.A6X9	II	9.84146	0
TCGA.P5.A5EY	II	11.8681	0
TCGA.HT.8108	II	10.5115	0
TCGA.QH.A65S	II	11.0006	0
TCGA.HT.A614	II	10.5963	0
TCGA.HT.7692	II	8.92041	0
TCGA.HT.7607	II	10.0348	0
TCGA.HT.7474	II	10.6356	0
TCGA.HT.7485	II	12.0246	0
TCGA.P5.A5F0	II	8.92393	0
TCGA.HT.7605	II	10.4806	0
TCGA.CS.4938	II	11.9693	0
TCGA.HT.7880	II	10.5781	0
TCGA.RY.A83Y	II	9.0325	0
TCGA.P5.A5F1	II	11.686	0
TCGA.DB.A64Q	II	9.403	0
TCGA.HW.8322	II	9.4833	0
TCGA.HT.7478	II	11.0597	0
TCGA.HT.7476	II	10.3934	0
TCGA.P5.A5EW	II	11.474	0
TCGA.CS.6667	II	10.965	0
TCGA.P5.A5F2	II	10.3283	0
TCGA.S9.A7J1	II	10.3803	0
TCGA.P5.A731	II	10.9804	0
TCGA.QH.A6CZ	II	8.16325	0
TCGA.HT.8012	II	8.88188	0
TCGA.QH.A6X3	II	9.75903	0
TCGA.HT.A74J	II	11.0034	0
TCGA.CS.4944	II	11.8458	0
TCGA.HT.A74L	II	9.61144	0
TCGA.QH.A86X	II	9.21316	0
TCGA.HT.7884	II	10.7583	0
TCGA.DU.A76K	II	9.58637	-1
TCGA.QH.A6CX	II	10.747	0
TCGA.QH.A65V	II	9.70156	0
TCGA.WH.A86K	II	11.0355	0
TCGA.DU.5853	II	10.9039	0
TCGA.HW.7487	II	8.92998	0
TCGA.VM.A8CA	II	11.5158	0
TCGA.P5.A733	II	10.5838	0
TCGA.FG.8182	II	9.89373	0
TCGA.QH.A65Z	II	9.79604	0
TCGA.S9.A6WQ	II	10.5188	0
TCGA.HT.7695	II	9.89636	0
TCGA.DU.5849	II	9.29844	0
TCGA.FG.A60J	II	10.6321	0
TCGA.FG.6689	II	10.6619	0
TCGA.FG.8188	II	10.5619	0
TCGA.FG.A6IZ	II	9.53143	0
TCGA.HT.7689	II	9.8714	0
TCGA.DU.5874	II	8.5857	0
TCGA.FG.7634	II	9.05289	0
TCGA.DU.8167	II	9.95155	-1
TCGA.TQ.A7RH	II	9.93314	0
TCGA.HT.A617	II	11.3832	0
TCGA.DB.A75P	II	11.6475	0
TCGA.TM.A84C	II	11.1901	0
TCGA.QH.A6X5	II	10.1281	0
TCGA.FG.A6J1	II	9.81652	0
TCGA.HT.7473	II	11.2522	0
TCGA.QH.A6XA	II	10.8811	0
TCGA.HT.A615	II	10.5317	0
TCGA.DU.8166	II	11.1362	0
TCGA.DH.A66F	II	9.79034	0
TCGA.DU.A76O	II	10.4786	-2
TCGA.HT.7606	II	7.87883	1
TCGA.DU.5872	II	10.4149	0
TCGA.HT.7693	II	9.58171	0
TCGA.FG.A60K	II	9.72606	0
TCGA.DB.A75M	II	11.2465	0
TCGA.S9.A6WO	II	10.9948	0
TCGA.TM.A84R	II	9.14649	0
TCGA.FG.A4MX	II	9.35782	0
TCGA.DB.A4XA	II	10.2173	0
TCGA.DU.5871	II	10.7477	0
TCGA.IK.7675	II	10.275	-1
TCGA.RY.A845	II	10.8406	0
TCGA.FG.7643	II	10.7014	0
TCGA.FG.8187	II	10.6367	0
TCGA.FG.A713	II	9.4341	0
TCGA.FG.7641	II	9.27303	0
TCGA.HW.A5KM	II	10.5159	0
TCGA.HW.A5KL	II	10.8965	0
TCGA.WY.A85E	II	9.08991	-2
TCGA.CS.5395	II	10.1357	0
TCGA.DU.8164	II	9.4238	0
TCGA.FG.A60L	II	10.6299	0
TCGA.DU.A6S3	II	9.04584	0
TCGA.HT.7608	II	11.6967	0
TCGA.FG.8189	II	9.3184	0
TCGA.DH.A7US	II	10.4009	0
TCGA.HT.7603	II	9.23687	-1
TCGA.VM.A8CH	II	10.2736	0
TCGA.HT.7873	II	9.04365	0
TCGA.FG.A4MY	II	9.66013	0
TCGA.TM.A84T	II	10.2364	0
TCGA.DB.A64L	II	8.82915	0
TCGA.TM.A84Q	II	8.46758	0
TCGA.DB.A64O	II	10.8976	0
TCGA.DU.A6S2	II	8.81866	0
TCGA.DU.7301	II	10.0253	0
TCGA.DU.A5TU	II	10.3806	-1
TCGA.TQ.A7RW	II	10.3091	0
TCGA.S9.A7QZ	II	8.77177	0
TCGA.DB.A64S	II	10.9753	0
TCGA.DB.A64U	II	9.08246	0
TCGA.S9.A7QY	II	9.24245	0
TCGA.FG.A70Y	II	10.7035	0
TCGA.DB.A64V	II	10.0653	0
TCGA.HT.8113	II	9.39584	0
TCGA.DU.A5TR	II	10.5808	0
TCGA.HT.7602	II	11.4399	0
TCGA.S9.A6U2	II	10.6015	0
TCGA.RY.A847	II	10.0508	0
TCGA.RY.A83X	II	9.53768	0
TCGA.DB.A64R	II	8.74903	0
TCGA.HT.7902	II	10.4875	0
TCGA.DB.A4XH	II	9.7655	0
TCGA.DU.A5TS	II	10.6096	0
TCGA.E1.A7Z6	II	11.3957	-2
TCGA.R8.A6MO	II	8.92392	0
TCGA.S9.A6U5	II	10.4754	0
TCGA.TM.A7CA	II	10.3513	0
TCGA.HW.7495	II	10.1046	0
TCGA.S9.A6TY	II	8.13944	0
TCGA.HT.7881	II	9.75437	0
TCGA.S9.A7IQ	II	9.51493	0
TCGA.DB.5280	II	11.2471	0
TCGA.FG.A710	II	10.1812	0
TCGA.E1.A7YW	II	10.541	0
TCGA.FG.5965	II	10.532	0
TCGA.S9.A6TZ	II	10.1124	0
TCGA.DU.A7TC	II	9.23002	0
TCGA.WY.A85D	II	11.0823	0
TCGA.HT.8018	II	10.3018	0
TCGA.FG.A4MT	II	9.87133	0
TCGA.S9.A6WH	II	8.60965	0
TCGA.VM.A8CE	II	10.0114	0
TCGA.EZ.7264	II	8.85157	0
TCGA.HT.7854	II	10.4675	0
TCGA.WY.A859	II	10.2492	0
TCGA.TM.A84L	II	11.2404	0
TCGA.FG.6691	II	11.3763	0
TCGA.HW.7489	II	10.2484	0
TCGA.DU.7306	II	10.6279	0
TCGA.FG.6690	II	11.0883	0
TCGA.VM.A8C8	II	10.8498	-1
TCGA.VM.A8C9	II	10.8708	0
TCGA.WY.A85A	II	10.536	0
TCGA.DU.A7TG	II	9.78094	0
TCGA.DB.5279	II	10.1177	0
TCGA.HT.7681	II	10.2495	0
TCGA.HW.7490	II	10.5528	0
TCGA.WY.A85B	II	9.97763	0
TCGA.DB.A4X9	II	11.5707	0
TCGA.DB.A4XC	II	11.0502	0
TCGA.WY.A85C	II	9.66043	-2
TCGA.TM.A7C4	II	10.3267	0
TCGA.FG.A711	II	10.8554	0
TCGA.DU.6395	II	11.036	0
TCGA.CS.6669	II	9.37434	0
TCGA.TM.A7C5	II	7.92312	0
TCGA.CS.6668	II	7.96977	0
TCGA.HT.7858	II	10.2019	0
TCGA.W9.A837	II	9.71352	0
TCGA.DU.A7TB	II	9.00273	0
TCGA.FG.5964	II	10.1404	0
TCGA.HT.7610	II	10.0675	0
TCGA.HW.7486	II	9.61813	0
TCGA.HT.7611	II	11.2079	0
TCGA.R8.A73M	II	8.57986	0
TCGA.DU.7007	II	10.2136	-1
TCGA.HT.8013	II	10.7485	0
TCGA.CS.5390	II	8.82304	0
TCGA.TM.A7CF	II	10.1236	0
TCGA.DU.6399	II	10.9566	0
TCGA.HW.7491	II	9.06946	0
TCGA.HW.7493	II	11.6262	0
TCGA.HT.7480	II	9.577	0
TCGA.E1.5318	II	9.61914	0
TCGA.DU.A7TA	II	9.86944	0
TCGA.S9.A6WI	II	9.47322	0
TCGA.S9.A6TU	II	10.6333	0
TCGA.DU.6401	II	9.95214	0
TCGA.R8.A6MK	II	10.6733	0
TCGA.DU.7015	II	10.7884	0
TCGA.DB.5278	II	9.38581	0
TCGA.DU.7294	II	8.72072	0
TCGA.DU.6407	II	10.5274	0
TCGA.DU.A6S6	II	9.72757	0
TCGA.E1.5319	II	9.61477	0
TCGA.HT.7481	II	9.45704	0
TCGA.S9.A6U8	II	11.1768	0
TCGA.S9.A7R7	II	11.6269	0
TCGA.S9.A7R3	II	10.7799	0
TCGA.DU.7011	II	11.187	0
TCGA.HT.7482	II	10.8643	0
TCGA.DU.7014	II	9.85345	-1
TCGA.HT.7604	II	8.82194	0
TCGA.S9.A6UB	II	8.67024	0
TCGA.E1.5322	II	9.93371	0
TCGA.S9.A6WE	II	8.96692	0
TCGA.DU.7009	II	9.48794	0
TCGA.DU.7008	II	10.0911	0
TCGA.S9.A7R1	II	9.35281	0
TCGA.HT.7483	II	10.1515	0
TCGA.DU.5870	II	10.4952	0
TCGA.CS.5394	III	8.73831	0
TCGA.HT.7471	III	9.76369	0
TCGA.HT.7687	III	9.12412	0
TCGA.HT.7690	III	10.5334	0
TCGA.HT.8106	III	11.0531	0
TCGA.HT.A5R9	III	8.77389	0
TCGA.HT.A74O	III	9.98788	0
TCGA.VM.A8CB	III	7.86853	0
TCGA.HT.7616	III	10.1184	0
TCGA.HT.7857	III	10.7338	0
TCGA.HT.8111	III	10.9461	-1
TCGA.HT.A4DS	III	11.648	1
TCGA.P5.A72U	III	12.1149	0
TCGA.HT.7860	III	11.5463	0
TCGA.DU.A7TJ	III	10.0506	-1
TCGA.P5.A5F4	III	10.3733	0
TCGA.S9.A7J2	III	8.95246	0
TCGA.RY.A843	III	9.623	0
TCGA.QH.A6CY	III	9.114	0
TCGA.P5.A5EZ	III	9.80231	0
TCGA.DU.6542	III	9.17398	-1
TCGA.HT.A74H	III	10.8157	0
TCGA.DU.7309	III	10.1162	0
TCGA.HT.7879	III	10.7244	0
TCGA.HT.7882	III	11.2008	0
TCGA.HT.7601	III	10.322	0
TCGA.QH.A6XC	III	9.5032	0
TCGA.DU.8158	III	10.6254	1
TCGA.HT.A5RC	III	10.9428	0
TCGA.HT.8109	III	9.77905	0
TCGA.FG.A87Q	III	11.4722	0
TCGA.S9.A6UA	III	11.5195	0
TCGA.HT.7684	III	10.4882	0
TCGA.HT.8105	III	9.22127	0
TCGA.CS.5397	III	12.0161	0
TCGA.DU.7012	III	11.4744	0
TCGA.CS.6670	III	9.49667	0
TCGA.DU.5852	III	11.0614	0
TCGA.HT.7468	III	9.35759	0
TCGA.DU.5855	III	10.062	0
TCGA.HT.7694	III	9.46549	0
TCGA.DU.6402	III	11.7686	0
TCGA.DU.A7TD	III	10.7394	0
TCGA.CS.4941	III	11.9439	0
TCGA.S9.A7IS	III	9.76028	0
TCGA.VM.A8CD	III	12.119	0
TCGA.DH.5144	III	8.6509	0
TCGA.DU.6410	III	7.57487	0
TCGA.DU.7292	III	9.72709	0
TCGA.P5.A5EX	III	11.8195	0
TCGA.VW.A8FI	III	9.81535	0
TCGA.DU.5854	III	10.826	0
TCGA.DU.7013	III	10.7113	1
TCGA.RY.A83Z	III	9.50408	0
TCGA.CS.5396	III	10.729	0
TCGA.DU.7290	III	11.8794	0
TCGA.P5.A72W	III	10.0125	0
TCGA.S9.A7R2	III	11.4895	0
TCGA.HW.A5KJ	III	8.40149	0
TCGA.FG.A4MU	III	10.4816	0
TCGA.FG.A70Z	III	11.1565	0
TCGA.P5.A730	III	9.42477	0
TCGA.DB.A75L	III	9.21953	0
TCGA.DU.7006	III	11.6937	0
TCGA.HT.7469	III	7.73144	-1
TCGA.DU.6403	III	9.29966	0
TCGA.P5.A72Z	III	9.5097	0
TCGA.DB.A75K	III	9.39701	0
TCGA.HT.8104	III	10.1324	0
TCGA.CS.6665	III	10.6761	0
TCGA.HW.A5KK	III	10.9377	0
TCGA.QH.A870	III	11.724	0
TCGA.P5.A72X	III	11.393	0
TCGA.QH.A6CW	III	9.93852	0
TCGA.DH.A7UU	III	9.14442	0
TCGA.HT.8110	III	11.3767	0
TCGA.DU.8168	III	8.26532	0
TCGA.FG.8185	III	9.67711	0
TCGA.HT.7620	III	9.89006	0
TCGA.DB.A64W	III	7.96867	0
TCGA.KT.A74X	III	9.269	0
TCGA.KT.A7W1	III	10.1465	0
TCGA.QH.A6CV	III	9.89231	0
TCGA.QH.A6X4	III	9.18395	0
TCGA.DU.8162	III	10.0305	0
TCGA.QH.A6CU	III	11.062	0
TCGA.TM.A84S	III	10.6601	0
TCGA.DU.7010	III	9.61546	0
TCGA.S9.A7QW	III	10.6884	0
TCGA.QH.A65R	III	8.86574	0
TCGA.HT.A74K	III	9.72121	0
TCGA.HT.8564	III	10.7964	-1
TCGA.QH.A65X	III	9.70908	0
TCGA.FG.8186	III	10.2458	0
TCGA.VV.A86M	III	8.843	0
TCGA.HT.7677	III	9.34489	0
TCGA.HT.8011	III	10.3175	0
TCGA.QH.A6X8	III	9.00743	0
TCGA.DU.6406	III	10.332	0
TCGA.HT.A618	III	10.3115	0
TCGA.HT.7475	III	9.10354	0
TCGA.DH.A7UT	III	10.1748	0
TCGA.DU.5851	III	10.0275	0
TCGA.HT.A61B	III	10.1859	0
TCGA.HT.A61C	III	12.0309	0
TCGA.CS.6186	III	11.4577	0
TCGA.CS.6290	III	11.4749	0
TCGA.FG.7636	III	10.0789	0
TCGA.DU.5847	III	11.484	0
TCGA.DU.A7T6	III	9.55809	0
TCGA.CS.4943	III	9.40878	0
TCGA.FG.6692	III	9.88454	0
TCGA.FG.A4MW	III	10.2164	0
TCGA.DB.A64X	III	10.0132	0
TCGA.S9.A7QX	III	10.0328	0
TCGA.DH.A7UV	III	10.5874	0
TCGA.FG.A87N	III	10.2984	0
TCGA.S9.A6WP	III	9.92742	0
TCGA.S9.A89V	III	10.8431	0
TCGA.FG.6688	III	10.6498	0
TCGA.S9.A6TV	III	10.0723	-1
TCGA.DU.7298	III	9.35999	-1
TCGA.DU.8165	III	11.6488	0
TCGA.HT.7855	III	9.71742	0
TCGA.DU.6405	III	11.5367	0
TCGA.S9.A6WM	III	11.0211	1
TCGA.DH.5140	III	10.3674	0
TCGA.S9.A7IZ	III	10.7895	0
TCGA.S9.A7J0	III	8.88577	0
TCGA.HT.A5R7	III	10.2147	0
TCGA.S9.A89Z	III	9.76467	0
TCGA.DU.8163	III	10.9289	0
TCGA.S9.A7J3	III	9.82211	0
TCGA.DU.A6S7	III	10.5284	0
TCGA.DU.A76R	III	10.3424	-1
TCGA.HT.A619	III	8.13546	-1
TCGA.DU.A6S8	III	8.4204	0
TCGA.FG.A6J3	III	9.31448	1
TCGA.DU.6394	III	8.14343	0
TCGA.FG.7638	III	10.3025	0
TCGA.VW.A7QS	III	8.72414	0
TCGA.DU.7304	III	10.5882	0
TCGA.S9.A7IY	III	11.0369	0
TCGA.DU.8161	III	11.8538	0
TCGA.CS.6188	III	10.9604	0
TCGA.TM.A84J	III	7.27482	-1
TCGA.HT.7477	III	9.42617	1
TCGA.DU.A5TT	III	10.0581	0
TCGA.S9.A6U0	III	11.332	0
TCGA.TM.A84M	III	8.51503	0
TCGA.TM.A84B	III	10.3304	-1
TCGA.DU.A5TW	III	10.0465	0
TCGA.FG.5963	III	11.5216	0
TCGA.S9.A6U1	III	10.1833	0
TCGA.HT.A4DV	III	10.0352	0
TCGA.DU.7019	III	9.86	0
TCGA.S9.A6WN	III	11.2022	0
TCGA.DU.A76L	III	10.3792	0
TCGA.S9.A7IX	III	11.1556	0
TCGA.HT.A5RA	III	10.586	0
TCGA.FN.7833	III	11.1966	0
TCGA.DH.A66D	III	11.1088	0
TCGA.RY.A840	III	8.64716	0
TCGA.S9.A6TX	III	9.36288	0
TCGA.TM.A84I	III	9.25525	0
TCGA.FG.8181	III	9.84608	0
TCGA.HT.8563	III	10.5634	0
TCGA.DB.A64P	III	9.08269	0
TCGA.S9.A7R4	III	10.6076	0
TCGA.DB.A4XB	III	10.3424	0
TCGA.DH.A669	III	9.10822	0
TCGA.TM.A84H	III	10.224	0
TCGA.DB.A75O	III	11.6894	0
TCGA.DU.7018	III	8.68594	0
TCGA.S9.A6WL	III	9.55214	0
TCGA.S9.A7R8	III	9.18115	0
TCGA.HT.7688	III	9.18681	0
TCGA.DH.5141	III	9.17546	0
TCGA.E1.A7YV	III	9.52084	-1
TCGA.FG.8191	III	10.4827	0
TCGA.HT.8019	III	9.81905	0
TCGA.TM.A84O	III	11.2855	0
TCGA.DU.A5TP	III	9.79245	0
TCGA.DB.A4XF	III	9.94062	0
TCGA.DU.A5TY	III	10.8188	0
TCGA.HT.8114	III	10.2396	0
TCGA.S9.A6U6	III	10.152	0
TCGA.VV.A829	III	7.74067	0
TCGA.HT.7874	III	9.69509	0
TCGA.DB.A4XE	III	10.5588	0
TCGA.HT.7856	III	9.61768	0
TCGA.DB.A4XD	III	10.6334	0
TCGA.HW.8319	III	10.6445	0
TCGA.HW.8320	III	10.0187	0
TCGA.HT.7470	III	10.3077	0
TCGA.CS.5393	III	10.1501	0
TCGA.HT.7479	III	11.46	0
TCGA.TM.A84G	III	8.8904	0
TCGA.E1.5304	III	7.38324	-1
TCGA.S9.A6TW	III	9.48197	0
TCGA.DH.A66B	III	9.76477	0
TCGA.HW.8321	III	9.73475	-1
TCGA.HT.7686	III	11.3995	0
TCGA.IK.8125	III	9.78774	0
TCGA.CS.4942	III	11.1811	0
TCGA.DU.7299	III	10.6663	0
TCGA.WY.A858	III	10.7974	0
TCGA.HT.7609	III	10.4003	0
TCGA.DH.5143	III	11.7517	0
TCGA.DU.6397	III	10.0646	0
TCGA.CS.6666	III	10.4963	-1
TCGA.FG.5962	III	10.3755	1
TCGA.DB.5275	III	9.77909	0
TCGA.E1.5302	III	11.4989	-1
TCGA.DB.5277	III	9.33223	-1
TCGA.DU.6393	III	7.87551	0
TCGA.DH.A7UR	III	9.28293	0
TCGA.TM.A7C3	III	9.66657	0
TCGA.E1.5307	III	10.3152	0
TCGA.TM.A84F	III	9.90609	0
TCGA.DU.7302	III	8.85808	0
TCGA.DU.7300	III	9.55342	-1
TCGA.S9.A6TS	III	9.95566	0
TCGA.DH.5142	III	10.16	0
TCGA.E1.5303	III	11.0003	0
TCGA.DB.5276	III	11.0031	0
TCGA.DB.A4XG	III	8.78993	0
TCGA.E1.A7YO	III	9.46405	0
TCGA.DB.5274	III	8.95892	0
TCGA.DU.6396	III	9.74792	0
TCGA.S9.A6WD	III	9.81228	0
TCGA.DB.5281	III	9.42461	-1
TCGA.E1.5305	III	9.44997	0
TCGA.DB.5273	III	10.9317	0
TCGA.S9.A6WG	III	11.6264	0
TCGA.R8.A6ML	III	9.07782	0
TCGA.S9.A6U9	III	11.1603	0
TCGA.DU.6408	III	10.6892	0
TCGA.DB.5270	III	10.4649	0
TCGA.DU.6404	III	11.8062	0
TCGA.E1.5311	III	8.3498	0
TCGA.DU.A7T8	III	10.6331	0
TCGA.DU.6392	III	9.29758	0
TCGA.06.0178	IV	8.46191	0
TCGA.06.5417	IV	8.55633	#N/A
TCGA.14.0790	IV	8.8727	0
TCGA.12.3652	IV	8.9783	0
TCGA.12.0618	IV	9.039	0
TCGA.27.2523	IV	9.06237	0
TCGA.06.5416	IV	9.08762	1
TCGA.41.5651	IV	9.16648	0
TCGA.06.2559	IV	9.22547	0
TCGA.06.2563	IV	9.35148	0
TCGA.12.1597	IV	9.37163	#N/A
TCGA.06.5415	IV	9.4447	-1
TCGA.06.0211	IV	9.44681	1
TCGA.06.0219	IV	9.451	0
TCGA.27.1835	IV	9.47129	0
TCGA.19.1390	IV	9.49704	0
TCGA.76.4925	IV	9.50673	0
TCGA.06.0129	IV	9.57436	0
TCGA.41.2572	IV	9.59885	0
TCGA.26.1442	IV	9.60101	0
TCGA.14.1402	IV	9.61347	0
TCGA.06.5418	IV	9.65104	0
TCGA.28.2514	IV	9.71177	0
TCGA.19.2624	IV	9.72009	0
TCGA.28.5209	IV	9.72604	0
TCGA.06.0238	IV	9.82874	0
TCGA.06.0743	IV	9.83875	1
TCGA.14.1829	IV	9.84044	1
TCGA.12.3653	IV	9.84436	-1
TCGA.27.2524	IV	9.89775	0
TCGA.12.3650	IV	9.90728	0
TCGA.06.0125	IV	9.9105	0
TCGA.06.2570	IV	9.91753	0
TCGA.41.2571	IV	9.91873	0
TCGA.76.4931	IV	9.95218	0
TCGA.06.5859	IV	10.0053	-1
TCGA.06.5411	IV	10.0377	0
TCGA.14.1823	IV	10.0536	-1
TCGA.06.0156	IV	10.0592	#N/A
TCGA.32.5222	IV	10.074	0
TCGA.19.2629	IV	10.0931	1
TCGA.26.5136	IV	10.1053	0
TCGA.06.2569	IV	10.1208	-1
TCGA.06.0744	IV	10.1336	0
TCGA.26.5134	IV	10.1364	0
TCGA.32.1970	IV	10.1746	0
TCGA.06.2557	IV	10.1769	1
TCGA.06.2565	IV	10.1782	1
TCGA.06.5856	IV	10.1836	1
TCGA.06.0152	IV	10.2109	-1
TCGA.28.5208	IV	10.2514	0
TCGA.06.0747	IV	10.2984	0
TCGA.27.1831	IV	10.3131	1
TCGA.27.2521	IV	10.3298	1
TCGA.19.2620	IV	10.3422	0
TCGA.06.2567	IV	10.3451	0
TCGA.14.0817	IV	10.3587	1
TCGA.28.1747	IV	10.3729	0
TCGA.08.0386	IV	10.3738	-1
TCGA.06.0184	IV	10.4026	0
TCGA.02.2483	IV	10.4119	0
TCGA.19.5960	IV	10.42	0
TCGA.14.0736	IV	10.4214	0
TCGA.32.1982	IV	10.4228	0
TCGA.06.2558	IV	10.4297	0
TCGA.14.0789	IV	10.4379	-1
TCGA.26.5133	IV	10.4585	0
TCGA.06.0132	IV	10.4677	0
TCGA.32.2634	IV	10.4894	0
TCGA.14.1825	IV	10.5071	1
TCGA.28.5220	IV	10.5321	0
TCGA.76.4929	IV	10.5358	-1
TCGA.06.0174	IV	10.5602	0
TCGA.27.1837	IV	10.5653	0
TCGA.28.5213	IV	10.5669	0
TCGA.15.1444	IV	10.5687	0
TCGA.06.1804	IV	10.6093	0
TCGA.06.5858	IV	10.6778	0
TCGA.26.5139	IV	10.6794	0
TCGA.76.4932	IV	10.6932	#N/A
TCGA.06.0157	IV	10.6952	0
TCGA.06.0646	IV	10.7076	0
TCGA.06.0138	IV	10.7088	0
TCGA.06.0210	IV	10.7131	0
TCGA.02.0047	IV	10.737	1
TCGA.26.5135	IV	10.7376	0
TCGA.19.0957	IV	10.747	0
TCGA.19.2625	IV	10.7502	0
TCGA.06.0158	IV	10.7816	0
TCGA.27.1832	IV	10.8125	0
TCGA.06.5412	IV	10.8127	0
TCGA.06.0141	IV	10.8148	0
TCGA.27.2528	IV	10.823	0
TCGA.06.5414	IV	10.8322	0
TCGA.02.2485	IV	10.8436	0
TCGA.32.1980	IV	10.8442	0
TCGA.28.5204	IV	10.8465	0
TCGA.19.2619	IV	10.8492	0
TCGA.06.0749	IV	10.85	0
TCGA.28.1753	IV	10.8503	0
TCGA.06.0645	IV	10.8541	0
TCGA.32.2632	IV	10.8578	1
TCGA.06.2564	IV	10.8599	0
TCGA.32.2638	IV	10.9274	1
TCGA.06.0745	IV	10.9501	1
TCGA.19.1787	IV	10.9723	0
TCGA.32.4213	IV	10.9882	0
TCGA.14.2554	IV	10.994	0
TCGA.06.2561	IV	10.9987	0
TCGA.12.0821	IV	11.0176	0
TCGA.12.0616	IV	11.0723	0
TCGA.28.2513	IV	11.0813	0
TCGA.06.0686	IV	11.0815	1
TCGA.06.5410	IV	11.0952	0
TCGA.26.5132	IV	11.132	0
TCGA.27.1830	IV	11.1625	1
TCGA.06.2562	IV	11.1689	0
TCGA.12.0619	IV	11.1933	1
TCGA.06.0187	IV	11.2624	0
TCGA.28.5207	IV	11.2754	1
TCGA.16.0846	IV	11.2762	0
TCGA.06.5408	IV	11.2848	0
TCGA.28.5216	IV	11.3398	1
TCGA.15.0742	IV	11.3603	0
TCGA.06.0750	IV	11.3769	0
TCGA.06.0649	IV	11.4466	1
TCGA.12.5295	IV	11.5326	0
TCGA.12.5299	IV	11.5557	0
TCGA.06.0168	IV	11.5955	0
TCGA.28.5215	IV	11.6155	1
TCGA.16.1045	IV	11.6356	0
TCGA.27.1834	IV	11.6438	1
TCGA.06.0171	IV	11.6583	0
TCGA.14.0787	IV	11.6782	0
TCGA.41.3915	IV	11.7239	1
TCGA.76.4927	IV	11.7322	#N/A
TCGA.06.0190	IV	11.7349	0
TCGA.06.0878	IV	11.7397	0
TCGA.27.2519	IV	11.7537	0
TCGA.06.0882	IV	11.7604	0
TCGA.76.4926	IV	11.808	0
TCGA.32.2615	IV	11.8155	-1
TCGA.41.4097	IV	11.8863	1
TCGA.27.2526	IV	11.9165	0
TCGA.06.0130	IV	11.9222	0
TCGA.28.5218	IV	11.9571	0
TCGA.28.2509	IV	11.98	1
TCGA.06.5413	IV	12.0018	0
TCGA.76.4928	IV	12.0052	0
TCGA.02.2486	IV	12.1589	0
TCGA.14.0781	IV	12.3208	0
TCGA.32.2616	IV	12.4157	0
TCGA.14.1034	IV	12.4201	0
TCGA.06.0644	IV	12.4968	0
TCGA.19.1389	IV	13.0204	0

## Sheet: Sheet3
Grade II				Grade III				Grade IV
amplification 2/224	deletion 13/224	224		amplification 7/243	deletion 19/243	243		amplification 27/150	deletion 10/150	150
1	-1	0		1	-1	0		1	-1	0
1	-1	0		1	-1	0		1	-1	0
	-1	0		1	-1	0		1	-1	0
	-2	0		1	-1	0		1	-1	0
	-1	0		1	-1	0		1	-1	0
	-2	0		1	-1	0		1	-1	1
	-1	0		1	-1	0		1	-1	0
	-1	0			-1	0		1	-1	0
	-2	0			-1	0		1	-1	0
	-1	0			-1	0		1	-1	-1
	-2	0			-1	-1		1		1
	-1	0			-1	1		1		0
	-1	0			-1	0		1		0
		1			-1	0		1		0
		-1			-1	-1		1		0
		0			-1	0		1		0
		0			-1	0		1		0
		0			-1	0		1		0
		0			-1	0		1		0
		0				0		1		0
		0				-1		1		0
		0				0		1		0
		0				0		1		0
		0				0		1		0
		0				0		1		1
		0				0		1		1
		0				0		1		-1
		0				1				0
		0				0				0
		0				0				0
		0				0				0
		0				0				0
		0				0				0
		0				0				-1
		0				0				0
		0				0				-1
		0				0				0
		0				0				1
		0				0				0
		0				0				-1
		0				0				0
		0				0				0
		0				0				0
		0				0				1
		0				0				1
		0				0				1
		0				0				-1
		0				0				0
		0				0				0
		-1				0				1
		0				0				1
		0				0				0
		0				1				0
		0				0				1
		0				0				0
		0				0				-1
		0				0				0
		0				0				0
		0				0				0
		0				0				0
		0				0				0
		0				0				0
		0				0				-1
		0				0				0
		0				-1				0
		0				0				0
		0				0				1
		0				0				0
		0				0				-1
		-1				0				0
		0				0				0
		0				0				0
		0				0				0
		0				0				0
		0				0				0
		0				0				0
		0				0				0
		0				0				0
		0				0				0
		0				0				0
		0				0				1
		-2				0				0
		1				0				0
		0				0				0
		0				0				0
		0				0				0
		0				0				0
		0				0				0
		0				0				0
		0				0				0
		0				0				0
		0				-1				0
		-1				0				0
		0				0				0
		0				0				0
		0				0				0
		0				0				0
		0				0				1
		0				0				0
		0				0				1
		-2				0				1
		0				0				0
		0				0				0
		0				0				0
		0				0				0
		0				0				0
		0				0				0
		0				0				0
		-1				0				1
		0				0				0
		0				0				0
		0				0				1
		0				0				0
		0				0				1
		0				0				0
		0				0				1
		0				0				0
		0				0				0
		-1				0				1
		0				0				0
		0				-1				0
		0				-1				1
		0				0				0
		0				0				0
		0				0				0
		0				1				1
		0				0				0
		0				0				1
		0				0				0
		0				0				0
		0				0				1
		0				0				0
		0				0				0
		0				0				0
		0				-1				0
		0				-1				0
		-2				0				-1
		0				1				1
		0				0				0
		0				0				0
		0				0				0
		0				0				1
		0				0				0
		0				0				0
		0				0				0
		0				-1				0
		0				1				0
		0				0				0
		0				0				0
		0				0				0
		0				-1
		0				0
		0				0
		0				0
		0				0
		0				0
		0				0
		0				0
		0				0
		0				0
		0				0
		0				0
		0				0
		-1				0
		0				0
		0				0
		0				0
		0				0
		0				0
		0				0
		0				0
		0				0
		0				0
		-2				0
		0				0
		0				0
		0				0
		0				0
		0				-1
		0				0
		0				0
		0				0
		0				0
		0				0
		0				0
		0				0
		0				0
		0				0
		-1				0
		0				0
		0				0
		0				0
		0				0
		0				0
		0				0
		0				0
		0				0
		0				0
		0				-1
		0				0
		0				0
		0				-1
		0				0
		0				0
		0				0
		0				0
		0				0
		0				0
		0				0
		0				0
		0				-1
		0				1
		0				0
		0				-1
		-1				-1
		0				0
		0				0
		0				0
		0				0
		0				0
		0				0
		0				-1
		0				0
		0				0
						0
						0
						0
						0
						0
						0
						0
						-1
						0
						0
						0
						0
						0
						0
						0
						0
						0
						0
						0
